# Supplementary material
Source: publisher figshare collection journal article supplement (https://sage.figshare.com/ndownloader/files/20135882)

### **Appendix. Caregiver Anosognosia Scale ratings.**

Rating of Anosognosia Scale (AS) by caregiver was collected in conjunction with the patient and clinician, which combined to a total of thirty-eight triads. Total AS scores between rater pairs (e.g. clinician-caregiver) were then compared according to anosognosia status: no anosognosia (patient-clinician discrepancy of  $\leq 5$ ) and anosognosia ( $\geq 6$ ), see graph. Ten out of 38 patients had anosognosia. Mean score of all caregiver AS rating was 22.3(6.9) with subgroup mean of 23.9(7.2) in no anosognosia and 17.7(2.5) in anosognosia ( $p < 0.001$ ). The patient-caregiver discrepancy method substantiated anosognosia in eight out of 10 patients and no anosognosia in eighteen out of 28 patients, which presented a sensitivity of 44.4% (21.5-69.2) and a specificity of 90.0% (68.3-98). A cut-off clinician-caregiver discrepancy score of  $\leq 5$  also distinguished all of anosognosia patients and nineteen out of 28 patients with no anosognosia. Sensitivity and specificity for clinician-caregiver discrepancy were 52.6% (28.9-75.6) and 100% (82.4-100) respectively.

Graph. Between-raters discrepancy of anosognosia scores (grouped according to anosognosia status)

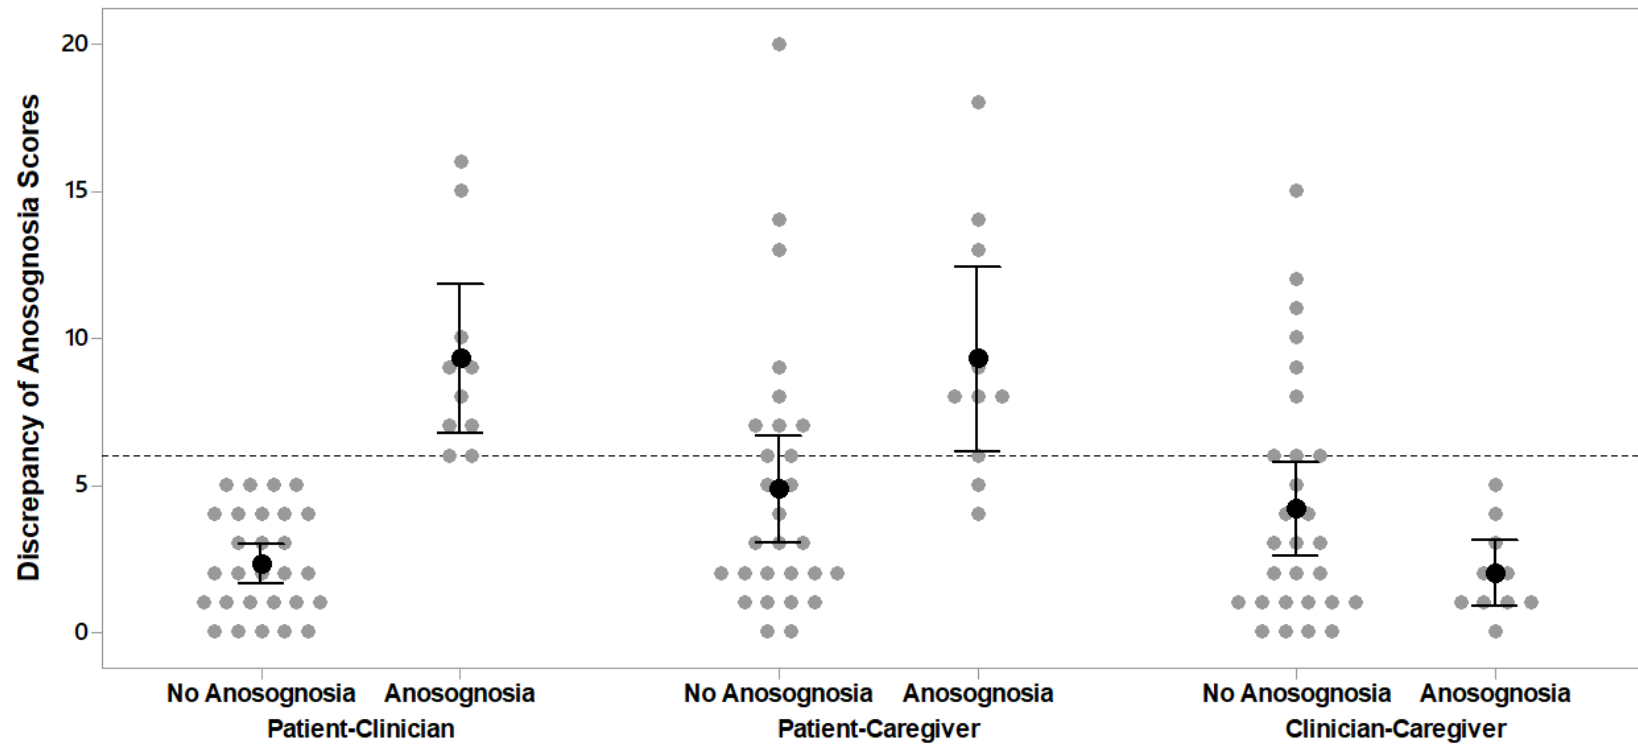

Supplement: Supplementary file 1 [file 20135882]
